1  
2 **Clinical Performance of Direct RT-PCR Testing of Raw Saliva for Detection of SARS-**  
3 **CoV-2 in Symptomatic and Asymptomatic Individuals**

4  
5  
6 Rosa Castillo-Bravo<sup>1,\*</sup>, Noel Lucca<sup>1,\*</sup>, Linyi Lai<sup>1</sup>, Killian Marlborough<sup>1</sup>, Galina Brychkova<sup>1</sup>,  
7 Charlie Lonergan<sup>1</sup>, Justin O’Grady<sup>2</sup>, Nabil-Fareed Alikhan<sup>2</sup>, Alexander J. Trotter<sup>2</sup>, Andrew J.  
8 Page<sup>2</sup>, Breda Smyth<sup>3,4</sup>, Peter C. McKeown<sup>1</sup>, Jelena D. M. Feenstra<sup>5,+</sup>, Camilla Ulekleiv<sup>5</sup>, Oceane  
9 Sorel<sup>5</sup>, Manoj Gandhi<sup>5</sup>, and Charles Spillane<sup>1,+</sup>

10  
11 Affiliations: <sup>1</sup>Genetics & Biotechnology Lab, Ryan Institute, National University of Ireland  
12 Galway, University Road, Galway H91 REW4, Ireland; <sup>2</sup>Quadram Institute Bioscience, Norwich  
13 Research Park, Norwich, Norfolk, UK; <sup>3</sup>College of Medicine, Nursing and Health Sciences,  
14 National University of Ireland Galway, Ireland; <sup>4</sup>Health Service Executive (HSE) West, Merlin  
15 Park University Hospital, Galway, Ireland; <sup>5</sup>Thermo Fisher Scientific, South San Francisco,  
16 USA.

17  
18 \*These authors contributed equally to this publication

19  
20 +Authors for correspondence

21  
22  
23

24

25 **Abstract**

26 RT-qPCR tests based on RNA extraction from nasopharyngeal swab samples are promoted as  
27 the “gold standard” for SARS-CoV-2 detection. However, self-collected saliva samples offer a  
28 non-invasive alternative more suited to high-throughput testing. This study evaluated the  
29 performance of TaqPath COVID-19 Fast PCR Combo Kit 2.0 assay for detection of SARS-CoV-  
30 2 in raw saliva relative to a lab-developed direct RT-qPCR test (SalivaDirect-based PCR) and a  
31 RT-qPCR test based on RNA extraction from NPS samples. Both samples were collected from  
32 symptomatic and asymptomatic individuals (N=615). Saliva samples were tested for SARS-  
33 CoV-2 using the TaqPath COVID-19 Fast PCR Combo Kit 2.0 and the SalivaDirect-based PCR,  
34 while RNA extracts from NPS samples were tested by RT-qPCR according to the Irish national  
35 testing system. The TaqPath™ COVID-19 Fast PCR detected SARS-CoV-2 in 52 saliva  
36 samples, of which 51 were also positive with the SalivaDirect-based PCR. 49 samples displayed  
37 concordant results with the NPS extraction-based method, while three samples were positive on  
38 raw saliva. Among the negative samples, 10 discordant cases were found with the TaqPath  
39 COVID-19 Fast PCR (PPA=85.7%; NPA=99.5%), when compared to the RNA extraction-based  
40 NPS method, performing similarly to the SalivaDirect-based PCR (PPA=87.5%; NPA=99.5%).  
41 The direct RT-qPCR testing of saliva samples shows high concordance with NPS extraction-  
42 based method for SARS-CoV-2 detection, providing a cost-effective and highly-scalable system  
43 for high-throughput COVID-19 rapid-testing.

## 44 **Introduction**

45 The emergence of severe acute respiratory syndrome coronavirus 2 (SARS-CoV-2) in Wuhan in  
46 2019 led to a global pandemic of coronavirus disease 2019 (COVID-19). SARS-CoV-2 can lead  
47 to both symptomatic and asymptomatic infections, making detection of infected individuals  
48 challenging if based solely on symptomatic diagnostic testing. To combat viral spread and ensure  
49 public health, countries have implemented different strategies related to diagnostic, screening  
50 and surveillance testing. COVID-19 tests should exhibit high sensitivity and quick turn-around-  
51 times to adapt treatment, reduce the spread of disease, and adjust public health interventions to  
52 the local epidemiology. Establishing COVID-19 testing in high-throughput settings such as  
53 schools or workplaces also requires tests that are easy to use, that require minimal resources and  
54 have a high acceptance rate by the individuals involved in the testing<sup>1</sup>.

55  
56 Detection of SARS-CoV-2 in RNA extracted from nasopharyngeal swab (NPS) samples using  
57 quantitative RT-qPCR is considered to be the gold standard for identification of COVID-19  
58 infection, as the virus typically infects the upper respiratory tract. However, reliable collection of  
59 NPS requires trained health care professionals, and NPS samples can be difficult to obtain from  
60 some individuals due to the discomfort associated with the technique. Using saliva as an  
61 alternative sample type to NPS offers several advantages, including non-invasive self-collection,  
62 reduced risk of viral transmission and lower sample costs in terms of trained health care  
63 personnel, personal protective equipment and costs associated with sample collection<sup>2</sup>.

64  
65 A number of studies have shown that saliva and NPS RT-PCR-based tests exhibited comparable  
66 analytical performance<sup>3-10</sup>. In addition, several reports indicate that saliva might be more

67 sensitive than nasopharyngeal or nasal swabs for diagnosis of SARS-CoV-2 infection, especially  
68 for asymptomatic cases or with the emergence of new SARS-CoV-2 variants that can have a  
69 different tropism compared to earlier variants<sup>7, 11-13</sup>. Indeed, the 2021 guidance on the use of  
70 saliva as sample material for COVID-19 testing highlighted the potential of saliva for nucleic  
71 acid based (i.e. PCR based) SARS-CoV-2 testing, while cautioning on the use of saliva as a  
72 sample for rapid antigen or antibody tests<sup>14</sup>.

73  
74 The aim of this retrospective study was to evaluate the performance of the TaqPath™ COVID-19  
75 Fast PCR Combo Kit 2.0 and our SalivaDirect-based (SDB) RT-PCR protocol in raw saliva  
76 specimens in comparison to the NPS RNA extraction-based TaqPath™ COVID-19 CE-IVD  
77 RT-PCR which is considered to be the gold standard for the detection of SARS-CoV-2.

78

## 79 **Methods**

### 80 **Clinical specimens**

81 Saliva samples from 615 individuals were collected in the Republic of Ireland (Galway) between  
82 February and May 2021 at two locations (Airport Testing Centre and National University of  
83 Ireland Galway). All individuals provided a signed informed consent, and the study was  
84 approved by the NUI Galway Research Ethics Committee (Approval Number: 2020.08.016;  
85 Amend 2102). Of the 615 individuals, 39.7% (N=244) were symptomatic, 35.3% (N=217) were  
86 asymptomatic, while the information on the symptomatic status was not available for the  
87 remaining part of the cohort (Figure 1A). The Asymptomatic or Symptomatic status of each  
88 individual was assigned based on answer given to the question “*Reason why you are being tested*  
89 *by the HSE*” in the registration form that was provided to each volunteers. Each individual who

90 indicated that they had a cough and/or high temperature were classified as symptomatic, while  
91 others were classified as asymptomatic (such individuals had been referred for testing as they  
92 had been contact traced in accordance with the government guidelines of the time). All saliva  
93 samples were tested upon collection using the SalivaDirect-based RT-PCR. Concurrent to saliva  
94 collection, NPS were collected and tested for SARS-CoV-2 presence using an RNA extraction-  
95 based method according to the national COVID-19 testing system in Ireland run by the Health  
96 Service Executive (HSE). Following circa 9 months of storage at -20 °C, raw saliva samples  
97 were thawed and re-tested using the lab's SDB RT-qPCR as well as the TaqPath™ COVID-19  
98 Fast PCR Combo Kit 2.0. Exclusion criteria included: inconclusive result on the TaqPath™  
99 COVID-19 Fast PCR Combo Kit 2.0 and altered status prior to and following storage on the  
100 SDB RT-PCR test.

101

## 102 **SARS-CoV-2 detection**

103 Raw saliva samples were tested upon collection and following storage using the SDB RT-PCR  
104 test. In brief, the samples were treated according to the SalivaDirect protocol; 25 uL of each raw  
105 saliva sample was collected on a 2.0 mL Eppendorf tube and treated with Proteinase K at 2.5  
106 ug/uL final concentration followed by heat inactivation at 95 °C for 5 minutes. RT-PCR was  
107 performed on the Applied Biosystems StepOnePlus™ Real-Time PCR System using the Applied  
108 Biosystem TaqMan™ Fast Virus 1-Step Master Mix together with the CDC 2019-Novel  
109 Coronavirus Real-time RT-PCR diagnostic panel and results analysed using the StepOne™  
110 Software v2.3. In parallel, saliva samples were tested using the TaqPath™ COVID-19 Fast PCR  
111 Combo Kit 2.0 according to the manufacturer's instructions. The TaqPath™ COVID-19 Fast  
112 PCR Combo Kit 2.0 is a fast direct PCR, without RNA extraction, which includes 8 targets

113 across 3 SARS-CoV-2 genes (Orf1a, Orf1b and N) to ensure accurate detection of SARS-CoV-2  
114 as new mutations continue to arise. RT-qPCR was performed on the QuantStudio™ 5 Real Time  
115 PCR Instrument with QuantStudio™ Design and Analysis software v1.5.1, and results were  
116 analyzed using the Pathogen Interpretive Software CE-IVD Edition 1.1.0. NPS samples were  
117 tested within the national HSE testing program using an RNA extraction-based RT-PCR with the  
118 TaqPath™ COVID-19 CE-IVD RT-PCR kit. The study design is shown in Figure 1B.

119

## 120 **Whole genome sequencing of SARS-CoV-2**

121 Whole genome sequencing (WGS) of a subset of the SARS-CoV-2 positive saliva samples (N =  
122 46) was performed on RNA extracted from saliva samples via a Quick DNA/RNA Viral  
123 MagBead kit (Zymo, R2140). RNA samples were sent on dry ice to the Quadram Institute  
124 Bioscience, UK for WGS of SARS-CoV-2. Viral RNA was converted in cDNA and then  
125 amplified using the ARTIC protocol v3 (LoCost)<sup>15</sup> with sequencing libraries prepared using  
126 CoronaHiT<sup>16</sup>. WGS was performed using the Illumina NextSeq 500 platform with one positive  
127 control and one negative control. The raw reads were demultiplexed using bcl2fastq (v2.20). The  
128 reads were used to generate a consensus sequence using the ARTIC bioinformatic pipeline  
129 (<https://github.com/connor-lab/ncov2019-artic-nf>). Briefly, the reads had adapters trimmed with  
130 TrimGalore<sup>17</sup>, and were aligned to the Wuhan Hu-1 reference genome (accession MN908947.3)  
131 using BWA-MEM (v0.7.17)<sup>18</sup>; the ARTIC amplicons were trimmed and a consensus built using  
132 iVar (v.1.3.0)<sup>19</sup>. Genomes that contained more than 10% missing data were excluded from  
133 further analysis to ensure high quality phylogenetic analysis. PANGO lineages were assigned  
134 using Pangolin (v2.3.2) (<https://github.com/cov-lineages/pangolin>) and PangoLEARN model  
135 dated 2021-02-21<sup>20</sup>.

136

137

## 138 **Results**

### 139 **RT-qPCR on raw saliva shows concordance with RT-qPCR on NPS-extracted RNA for** 140 **SARS-CoV-2 screening**

141 A total of 615 raw saliva samples obtained from symptomatic and asymptomatic individuals  
142 were tested following long-term storage at -20 °C using both the TaqPath™ COVID-19 Fast  
143 PCR Combo Kit 2.0 and the lab's SDB-PCR test. At the time of saliva sample collection, all  
144 individuals also provided NPS samples which were tested using an extraction-based RT-qPCR  
145 test in an HSE diagnostic laboratory. For all individuals in the study, the result of the RT-qPCR  
146 test from the nasopharyngeal swab sample was available. All raw saliva samples were tested  
147 both at the time of collection and again following long-term storage at -20 °C using the SDB RT-  
148 qPCR assay without an RNA extraction step. For all samples matching results were obtained at  
149 the time of sampling and at the time of repeated testing following long-term storage using the  
150 SDB RT-qPCR, indicating that no deterioration of sample had occurred.

151

152 To evaluate the performance of the direct RT-qPCR testing approach of raw saliva for detection  
153 of SARS-CoV-2, results obtained by testing with the TaqPath™ COVID-19 Fast PCR Combo  
154 Kit 2.0 were compared to the results based on the nasopharyngeal swab testing using an  
155 extraction-based RT-qPCR method (Table 1). SARS-CoV-2 was detected using the TaqPath™  
156 COVID-19 Fast PCR Combo Kit 2.0 in 52 raw saliva samples from the cohort panel, of which  
157 51 were in full agreement with both the SDB-PCR results at the time of collection and re-testing  
158 following storage at -20 °C. Interestingly, two samples tested positive only from raw saliva

159 (35<Ct<37). In both cases they tested positive consistently for both the TaqPath™ COVID-19  
160 Fast assay and the SDB-PCR, while the RNA extraction-based testing of the NPS in these cases  
161 yielded a negative result.

162 The performance of the lab's SDB RT-qPCR in raw saliva samples was also evaluated in  
163 comparison to the nasopharyngeal swab testing using an extraction-based RT-qPCR method  
164 (Table 2) and performed similarly to the TaqPath™ COVID-19 Fast assay.

165

### 166 **Raw saliva-based PCR testing is consistent and can be more sensitive than NPS**

167 SARS-CoV-2 was detected using the TaqPath™ COVID-19 Fast PCR Combo Kit 2.0 in 52 raw  
168 saliva samples from the cohort panel, from which 51 were in full agreement with both the SDB-  
169 PCR at the time of collection and re-testing following storage at -20°C. Interestingly, 2 samples  
170 were positive on raw saliva (35<Ct<37) using both the TaqPath™ COVID-19 Fast assay and the  
171 SDB-PCR, while the RNA extraction-based testing of the NPS in these cases showed a negative  
172 result.

173

174 Whole genome sequencing data was obtained for 46 of the SARS-CoV-2 positive samples. As  
175 expected based on the variants circulating in the Republic of Ireland during the period of sample  
176 collection (between February 8<sup>th</sup> and May 6<sup>th</sup>, 2021), the vast majority of the positive samples  
177 consisted of the B.1.1.7 lineage (N=45), with one sample identified as the B.1.562 lineage. When  
178 the SARS-CoV-2 clade was determined, 91.1% of the positive samples belonged to the 20I  
179 (Alpha, V1) clade, while 8.9% of the samples consisted of the 20A clade. WGS data was  
180 available for one of the two samples that showed positivity using both saliva-based testing  
181 methods while negative on RNA from NPS, and identified the presence of the Alpha VOC in the  
182 sample.



183

184 **Saliva-based testing offers good performance for different SARS-CoV-2 detection,**  
185 **including at low viral burden**

186 Of the 52 samples in which SARS-CoV-2 presence was detected using the TaqPath™ COVID-  
187 19 Fast PCR Combo Kit 2.0, 42.3% (N=22) of the samples showed a Ct<25, 44.2% (N=23)  
188 samples were between  $25 \leq Ct < 30$  and 13.4% (N=7) of the samples were of low viral load – with  
189  $Ct \geq 30$  (Figure 2A). Similar sample distribution across the 3 Ct ranges could be observed using  
190 the lab's SDB RT-qPCR (Figure 2A). The comparison of median Ct values in SARS-CoV-2  
191 positive individuals revealed no significant difference between the symptomatic and the  
192 asymptomatic patient cohort using both of the RT-qPCR assays used directly on raw saliva  
193 samples (Figure 2B-C).

194

195

196 **Discussion**

197 From the outset of the SARS-CoV-2 pandemic, both nucleic acid and antigen-based tests were  
198 developed and deployed, with a major focus on nasopharyngeal swabs as the biological sample  
199 of choice to be tested. However, saliva samples are the direct agents of transmission of SARS-  
200 CoV-2, through droplets and aerosols, thereby allowing for direct testing for presence of the  
201 biological agent within its transmission vehicle. While RT-PCR-based testing of RNA extracted  
202 from NPS samples has been considered as the “gold-standard” for SARS-CoV-2 detection, saliva  
203 has emerged during the pandemic as a valuable sampling method to improve SARS-CoV-2  
204 detection and workflows<sup>21</sup>. Besides the obvious advantage of self-collection associated with  
205 lower costs and reduced risks for viral transmission,<sup>8, 10</sup> raw saliva samples can be processed  
206 directly through RT-qPCR assays which reduces time and removes costs associated with RNA  
207 extraction. In addition, saliva (through droplets and aerosols) constitutes a transmission route for  
208 SARS-CoV-2 infection and can contain high viral loads of infectious virus as reported by recent  
209 studies<sup>7, 11, 12, 22</sup>. Thus, direct testing for SARS-CoV-2 in saliva can help monitor viral loads  
210 across variant surges and assess risk of transmission.

211  
212 Depending on variants, individual factors (genotype, age, health etc) and immunological status  
213 (vaccination, prior exposure), SARS-CoV-2 infections can range from asymptomatic to severe  
214 symptoms. In the current study we demonstrate that direct RT-qPCR from raw saliva samples  
215 using either our in-house developed SDB-PCR assay or a commercially available CE-IVD  
216 marked TaqPath Fast kit enables accurate detection of SARS-CoV-2 in both symptomatic and  
217 asymptomatic individuals with PPA of >83% and NPA of >99% when compared to the “gold-  
218 standard” RNA extraction-based RT-qPCR from nasopharyngeal swabs (Figure 2). Despite the

219 long-term storage (~ 9 months) of raw saliva samples included in the study, the accuracy  
220 between saliva and NPS testing was high. This demonstrates that raw saliva samples can be  
221 easily stored for long periods without the need for expensive additives or preservatives.

222

223 A number of studies have investigated the use of saliva as a sample method for SARS-CoV-2  
224 detection in comparison to nasopharyngeal swab testing. Although most studies compared RNA  
225 extraction-based protocols, the findings of such studies were consistent with our results which  
226 used direct RT-qPCR on raw saliva. For saliva samples vs NPS, Pasomsub *et al.* reported a  
227 diagnostic sensitivity of 84.3% and specificity of 98.9%<sup>23</sup>, while Yokota *et al.* reported a  
228 sensitivity of 92% and specificity of 99.96% for saliva sample versus NPS<sup>24</sup>. Other studies  
229 investigating direct PCR saliva based testing obtained comparable results with Moreno-Contreras  
230 *et al.* reporting sensitivity of 86.2%<sup>25</sup> and Vogels *et al.* a positive agreement of 94.1% and a  
231 negative agreement of 90.9% for direct PCR from saliva compared to extraction-based NPS  
232 testing<sup>26</sup>. Procop *et al.*, reported 100% positive agreement (38/38 positive specimens) and 99.4%  
233 negative agreement (177/178 negative specimens) by using saliva as specimens from  
234 symptomatic patients suspected of having COVID-19<sup>27</sup>. Saliva specimens from Covid-19  
235 confirmed patients even provide greater detection sensitivity and consistency due to an  
236 approximately 5X higher viral load compared to nasopharyngeal swabs<sup>10</sup>. Indeed, saliva can  
237 offer higher sensitivity and lower variability of saliva testing when compared to the NPS  
238 specimens<sup>2, 11</sup>. Our results also demonstrated that two saliva samples gave a positive result using  
239 both of the saliva-based direct PCR methods, one of which was confirmed by WGS, while these  
240 same samples tested negative on the extraction-based RT-PCR testing of matched

241 nasopharyngeal swabs. This finding suggests that saliva samples may result in greater accuracy  
242 from PCR-based testing than nasopharyngeal swabs.

243 In addition to structural differences between variants at the nucleic or polypeptide levels, the  
244 viral load and clearance across tissues and disease stages can potentially differ between variants  
245 which in turn could have an impact on what biological specimens are most suitable for detecting  
246 different variants. Indeed, the omicron SARS-CoV-2 variant poses a significant challenge for  
247 nasal swab based testing as there are indications that saliva based samples may be more effective  
248 for diagnostic detection of the omicron SARS-CoV-2 variant relative to NSPs<sup>12,22</sup>. Marais *et al.*  
249 have showed that saliva was a preferred sample for the detection of Omicron variant<sup>11</sup>, which is  
250 shown to have an altered tropism for the upper respiratory tract compared to the previous SARS-  
251 CoV-2 variants<sup>13</sup>.

252  
253 The use of a direct-PCR workflows offers an advantage in terms of time-to-result, which in case  
254 of both the TaqPath Fast kit and the lab-based SDB assay is under 2 hours. Rapid PCR-based  
255 SARS-CoV-2 detection is particularly important in high-frequency testing settings which is often  
256 associated with asymptomatic routine testing at workplaces or schools. Our data demonstrate no  
257 difference in viral loads between the asymptomatic and symptomatic individuals (Figure 2B-C),  
258 in line with previous studies<sup>28</sup>. Several studies have also evaluated the use of RT loop-mediated  
259 isothermal amplification (RT-LAMP) in saliva samples for fast detection of SARS-CoV-2. For  
260 instance, one study tested different RT-LAMP testing methods using saliva or NPS as sample,  
261 and found similar results when using purified/precipitated RNA from each sample type but with  
262 significantly reduced sensitivity when the sample is used directly (a reduction from 93% to

263 65%)<sup>29</sup>. Similar results for direct RT-LAMP were obtained by other groups, indicating  
264 significantly lower sensitivity of such approach compared to direct RT-PCR<sup>29-31</sup>.

265

266 A desirable feature of any diagnostic kit is the ability to detect different variants, particularly for  
267 the case of RNA viruses such as SARS-CoV-2 that are prone to mutation and recombination.

268 While genome sequencing is ideal for characterisation of individual samples, large-scale testing

269 based on genome sequencing has not to date been scaled for everyday practice. All diagnostic

270 tests for SARS-CoV-2 face the challenge of a constantly mutating viral population with periodic

271 emergence of viral variants that display fitness advantages that promote their transmission<sup>32</sup>. For

272 nucleic acid based tests, such challenges to detect new variants arise for homology-based

273 molecular tests (e.g. PCR, LAMP) where the mutations (indels) arise in regions that are detected

274 by sequence homology of the diagnostic test (e.g. the primers)<sup>33</sup>. The emergence of contagious

275 SARS-CoV-2 variants that have undergone significant mutational changes, and display fitness

276 advantages for enhanced transmission in human populations (vaccinated or unvaccinated), can

277 cause surges in COVID-19 cases, as recently exemplified by the Omicron variant. Therefore,

278 there is a high demand for accurate, mutation-resilient, high-throughput testing solutions for both

279 symptomatic and asymptomatic individuals. The development of multiplex assays with several

280 targets across the more conserved regions of the SARS-CoV-2 genome, as for example, the 8

281 targets in the TaqPath Fast 2.0 assay (targeting Orf1a, Orf1b and N gene) is crucial to enable

282 accurate detection of the virus and avoid false negative testing caused by viral mutations,

283 especially during high surges of cases.

284

285 **Conclusions**

286 The current COVID-19 pandemic has highlighted the need for diagnostic testing, screening and  
287 surveillance methods that are high-throughput and cost-effective. While point-of-care antigen  
288 testing has been deployed at scale globally, the reality is that the detection limit of antigen tests  
289 remains poorer than PCR-based methods. However, increasing the throughput of PCR-based  
290 testing for more accurate detection of SARS-CoV-2 has been constrained by the use of NPS  
291 which are costly and cumbersome to collect. In this study, we demonstrated that highly accurate  
292 PCR-based testing can be conducted directly on saliva samples, using a Saliva-Direct based test  
293 and a novel CE-IVD marked TaqPath™ COVID-19 Fast PCR Combo Kit 2.0. Saliva-based  
294 testing for SARS-CoV-2 provides a highly scalable and accurate approach for rapid detection of  
295 SARS-CoV-2 especially during surges of COVID-19 cases, for large-scale mass-testing which  
296 includes screening and surveillance programs.

297

## 298 **Acknowledgements**

299 This study was funded by Science Foundation Ireland grant no. 20/COV/0198 and 21/COV/3753 to  
300 CS. We are very grateful to Anne Wyllie (Yale University) and Michael Crone (Imperial  
301 College) for support and advice on this work. We are also grateful to the Health Service  
302 Executive of Ireland for assistance in sampling.

303

## 304 References

- 305 1. Mina MJ, Andersen KG: COVID-19 testing: One size does not fit all. *Science* 2021,  
306 371:126-127.
- 307 2. Wyllie AL, Fournier J, Casanovas-Massana A, Campbell M, Tokuyama M, Vijayakumar  
308 P, Warren JL, Geng B, Muenker MC, Moore AJ: Saliva or nasopharyngeal swab  
309 specimens for detection of SARS-CoV-2. *New England Journal of Medicine* 2020,  
310 383:1283-1286.
- 311 3. Bastos ML, Perlman-Arrow S, Menzies D, Campbell JR: The Sensitivity and Costs of  
312 Testing for SARS-CoV-2 Infection With Saliva Versus Nasopharyngeal Swabs : A  
313 Systematic Review and Meta-analysis. *Ann Intern Med* 2021, 174:501-510.
- 314 4. Butler-Laporte G, Lawandi A, Schiller I, Yao M, Dendukuri N, McDonald EG, Lee TC:  
315 Comparison of Saliva and Nasopharyngeal Swab Nucleic Acid Amplification Testing for  
316 Detection of SARS-CoV-2: A Systematic Review and Meta-analysis. *JAMA Intern Med*  
317 2021, 181:353-360.
- 318 5. Connor MC, Copeland M, Curran T: Investigation of saliva, tongue swabs and buccal  
319 swabs as alternative specimen types to nasopharyngeal swabs for SARS-CoV-2 testing. *J*  
320 *Clin Virol* 2022, 146:105053.
- 321 6. de Paula Eduardo F, Bezinelli LM, de Araujo CAR, Moraes JVV, Birbrair A, Pinho JRR,  
322 Hamerschlak N, Al-Hashimi I, Heller D: Self-collected unstimulated saliva, oral swab,  
323 and nasopharyngeal swab specimens in the detection of SARS-CoV-2. *Clin Oral Investig*  
324 2022, 26:1561-1567.
- 325 7. Williams E, Bond K, Zhang B, Putland M, Williamson DA: Saliva as a Noninvasive  
326 Specimen for Detection of SARS-CoV-2. *J Clin Microbiol* 2020, 58.
- 327 8. Fernandes LL, Pacheco VB, Borges L, Athwal HK, de Paula Eduardo F, Bezinelli L,  
328 Correa L, Jimenez M, Dame-Teixeira N, Lombaert IMA, Heller D: Saliva in the  
329 Diagnosis of COVID-19: A Review and New Research Directions. *J Dent Res* 2020,  
330 99:1435-1443.
- 331 9. Alqutaibi AY, Saeed MH, Aboalrejal AN: Saliva May Be Considered as Reliable Tool  
332 for Diagnosis of COVID-19 When Compared With Nasopharynx or Throat Swabs. *J*  
333 *Evid Based Dent Pract* 2021, 21:101530.
- 334 10. Wyllie AL, Fournier J, Casanovas-Massana A, Campbell M, Tokuyama M, Vijayakumar  
335 P, Geng B, Muenker MC, Moore AJ, Vogels CBF, Petrone ME, Ott IM, Lu P,  
336 Venkataraman A, Lu-Culligan A, Klein J, Earnest R, Simonov M, Datta R, Handoko R,  
337 Naushad N, Sewanan LR, Valdez J, White EB, Lapidus S, Kalinich CC, Jiang X, Kim  
338 DJ, Kudo E, Linehan M, Mao T, Moriyama M, Oh JE, Park A, Silva J, Song E,  
339 Takahashi T, Taura M, Weizman O-E, Wong P, Yang Y, Bermejo S, Odio C, Omer SB,  
340 Dela Cruz CS, Farhadian S, Martinello RA, Iwasaki A, Grubaugh ND, Ko AI: Saliva is  
341 more sensitive for SARS-CoV-2 detection in COVID-19 patients than nasopharyngeal  
342 swabs. *medRxiv* 2020:2020.2004.2016.20067835.
- 343 11. Marais Gert, Hsiao Nei-yuan, Iranzadeh Arash, Doolabh Deelan, Enoch Annabel, Chun-  
344 yat Chu, Williamson Carolyn, Brink Adrian, Diana H: Saliva swabs are the preferred  
345 sample for Omicron detection. *medRxiv* 2021.
- 346 12. Adamson B, Sikka R, Wyllie AL, Premsrirut P: Discordant SARS-CoV-2 PCR and Rapid  
347 Antigen Test Results When Infectious: A December 2021 Occupational Case Series.  
348 *medRxiv* 2022.

- 349 13. Hui KPY, Ho JCW, Cheung MC, Ng KC, Ching RHH, Lai KL, Kam TT, Gu H, Sit KY,  
350 Hsin MKY, Au TWK, Poon LLM, Peiris M, Nicholls JM, Chan MCW: SARS-CoV-2  
351 Omicron variant replication in human bronchus and lung ex vivo. *Nature* 2022.
- 352 14. Control ECfDPa: Considerations for the use of saliva as sample material for COVID-19  
353 testing. Stockholm: ECDC, 2021.
- 354 15. Quick J: NCoV-2019 Sequencing Protocol v3 (LoCost). Protocolsio 2020.
- 355 16. Baker DJ, Aydin A, Le-Viet T, Kay GL, Rudder S, de Oliveira Martins L, Tedim AP,  
356 Kolyva A, Diaz M, Alikhan NF, Meadows L, Bell A, Gutierrez AV, Trotter AJ, Thomson  
357 NM, Gilroy R, Griffith L, Adriaenssens EM, Stanley R, Charles IG, Elumogo N, Wain J,  
358 Prakash R, Meader E, Mather AE, Webber MA, Dervisevic S, Page AJ, O'Grady J:  
359 CoronaHiT: high-throughput sequencing of SARS-CoV-2 genomes. *Genome Med* 2021,  
360 13:21.
- 361 17. Krueger F: 2020. FelixKrueger/TrimGalore. Perl. 2016.
- 362 18. Heng L: Aligning Sequence Reads, Clone Sequences and Assembly Contigs with BWA-  
363 MEM. ArXiv 2013:1303.3997 [q-Bio].
- 364 19. Grubaugh ND, Gangavarapu K, Quick J, Matteson NL, De Jesus JG, Main BJ, Tan AL,  
365 Paul LM, Brackney DE, Grewal S, Gurfield N, Van Rompay KKA, Isern S, Michael SF,  
366 Coffey LL, Loman NJ, Andersen KG: An amplicon-based sequencing framework for  
367 accurately measuring intrahost virus diversity using PrimalSeq and iVar. *Genome Biol*  
368 2019, 20:8.
- 369 20. Rambaut A, Holmes EC, O'Toole Á, Hill V, McCrone JT, Ruis C, du Plessis L, Pybus  
370 OG: A dynamic nomenclature proposal for SARS-CoV-2 lineages to assist genomic  
371 epidemiology. *Nat Microbiol* 2020, 5:1403-1407.
- 372 21. Tan SH, Allicock O, Armstrong-Hough M, Wyllie AL: Saliva as a gold-standard sample  
373 for SARS-CoV-2 detection. *Lancet Respir Med* 2021, 9:562-564.
- 374 22. Lai J, German J, Hong F, Tai S-HS, McPhaul KM, Milton DK, Group ftUoMSR:  
375 Comparison of Saliva and Mid-Turbinate Swabs for Detection of COVID-19. *medRxiv*  
376 2022:2021.2012.2001.21267147.
- 377 23. Pasomsub E, Watcharananan SP, Boonyawat K, Janchompoo P, Wongtabtim G,  
378 Sukswan W, Sungkanuparph S, Phuphuakrat A: Saliva sample as a non-invasive  
379 specimen for the diagnosis of coronavirus disease 2019: a cross-sectional study. *Clin*  
380 *Microbiol Infect* 2021, 27:285.e281-285.e284.
- 381 24. Yokota I, Shane PY, Okada K, Unoki Y, Yang Y, Inao T, Sakamaki K, Iwasaki S,  
382 Hayasaka K, Sugita J, Nishida M, Fujisawa S, Teshima T: Mass Screening of  
383 Asymptomatic Persons for Severe Acute Respiratory Syndrome Coronavirus 2 Using  
384 Saliva. *Clin Infect Dis* 2021, 73:e559-e565.
- 385 25. Moreno-Contreras J, Espinoza MA, Sandoval-Jaime C, Cantú-Cuevas MA, Barón-  
386 Olivares H, Ortiz-Orozco OD, Muñoz-Rangel AV, Hernández-de la Cruz M, Eroza-  
387 Osorio CM, Arias CF, López S: Saliva Sampling and Its Direct Lysis, an Excellent  
388 Option To Increase the Number of SARS-CoV-2 Diagnostic Tests in Settings with  
389 Supply Shortages. *J Clin Microbiol* 2020, 58.
- 390 26. Vogels CBF, Watkins AE, Harden CA, Brackney DE, Shafer J, Wang J, Caraballo C,  
391 Kalinich CC, Ott IM, Fauver JR, Kudo E, Lu P, Venkataraman A, Tokuyama M, Moore  
392 AJ, Muenker MC, Casanovas-Massana A, Fournier J, Bermejo S, Campbell M, Datta R,  
393 Nelson A, Yale IRT, Dela Cruz CS, Ko AI, Iwasaki A, Krumholz HM, Matheus JD, Hui  
394 P, Liu C, Farhadian SF, Sikka R, Wyllie AL, Grubaugh ND: SalivaDirect: A simplified



- 395 and flexible platform to enhance SARS-CoV-2 testing capacity. *Med (N Y)* 2021, 2:263-  
396 280 e266.
- 397 27. Procop GW, Shrestha NK, Vogel S, Van Sickle K, Harrington S, Rhoads DD, Rubin BP,  
398 Terpeluk P: A Direct Comparison of Enhanced Saliva to Nasopharyngeal Swab for the  
399 Detection of SARS-CoV-2 in Symptomatic Patients. *J Clin Microbiol* 2020, 58.
- 400 28. Zuin M, Gentili V, Cervellati C, Rizzo R, Zuliani G: Viral Load Difference between  
401 Symptomatic and Asymptomatic COVID-19 Patients: Systematic Review and Meta-  
402 Analysis. *Infect Dis Rep* 2021, 13:645-653.
- 403 29. Uribe-Alvarez C, Lam Q, Baldwin DA, Chernoff J: Low saliva pH can yield false  
404 positives results in simple RT-LAMP-based SARS-CoV-2 diagnostic tests. *PLoS One*  
405 2021, 16:e0250202.
- 406 30. Nagura-Ikeda M, Imai K, Tabata S, Miyoshi K, Murahara N, Mizuno T, Horiuchi M,  
407 Kato K, Imoto Y, Iwata M, Mimura S, Ito T, Tamura K, Kato Y: Clinical Evaluation of  
408 Self-Collected Saliva by Quantitative Reverse Transcription-PCR (RT-qPCR), Direct  
409 RT-qPCR, Reverse Transcription-Loop-Mediated Isothermal Amplification, and a Rapid  
410 Antigen Test To Diagnose COVID-19. *J Clin Microbiol* 2020, 58:e01438-01420.
- 411 31. Taki K, Yokota I, Fukumoto T, Iwasaki S, Fujisawa S, Takahashi M, Negishi S,  
412 Hayasaka K, Sato K, Oguri S, Nishida M, Sugita J, Konno S, Saito T, Teshima T: SARS-  
413 CoV-2 detection by fluorescence loop-mediated isothermal amplification with and  
414 without RNA extraction. *J Infect Chemother* 2021, 27:410-412.
- 415 32. Markov PV, Katzourakis A, Stilianakis NI: Antigenic evolution will lead to new SARS-  
416 CoV-2 variants with unpredictable severity. *Nat Rev Microbiol* 2022:1-2.
- 417 33. Rajib SA, Ogi Y, Hossain MB, Ikeda T, Tanaka E, Kawaguchi T, Satou Y: A SARS-  
418 CoV-2 Delta variant containing mutation in the probe binding region used for RT-qPCR  
419 test in Japan exhibited atypical PCR amplification and might induce false negative result.  
420 *J Infect Chemother* 2022, 28:669-677.

421

422

423 Figure 1

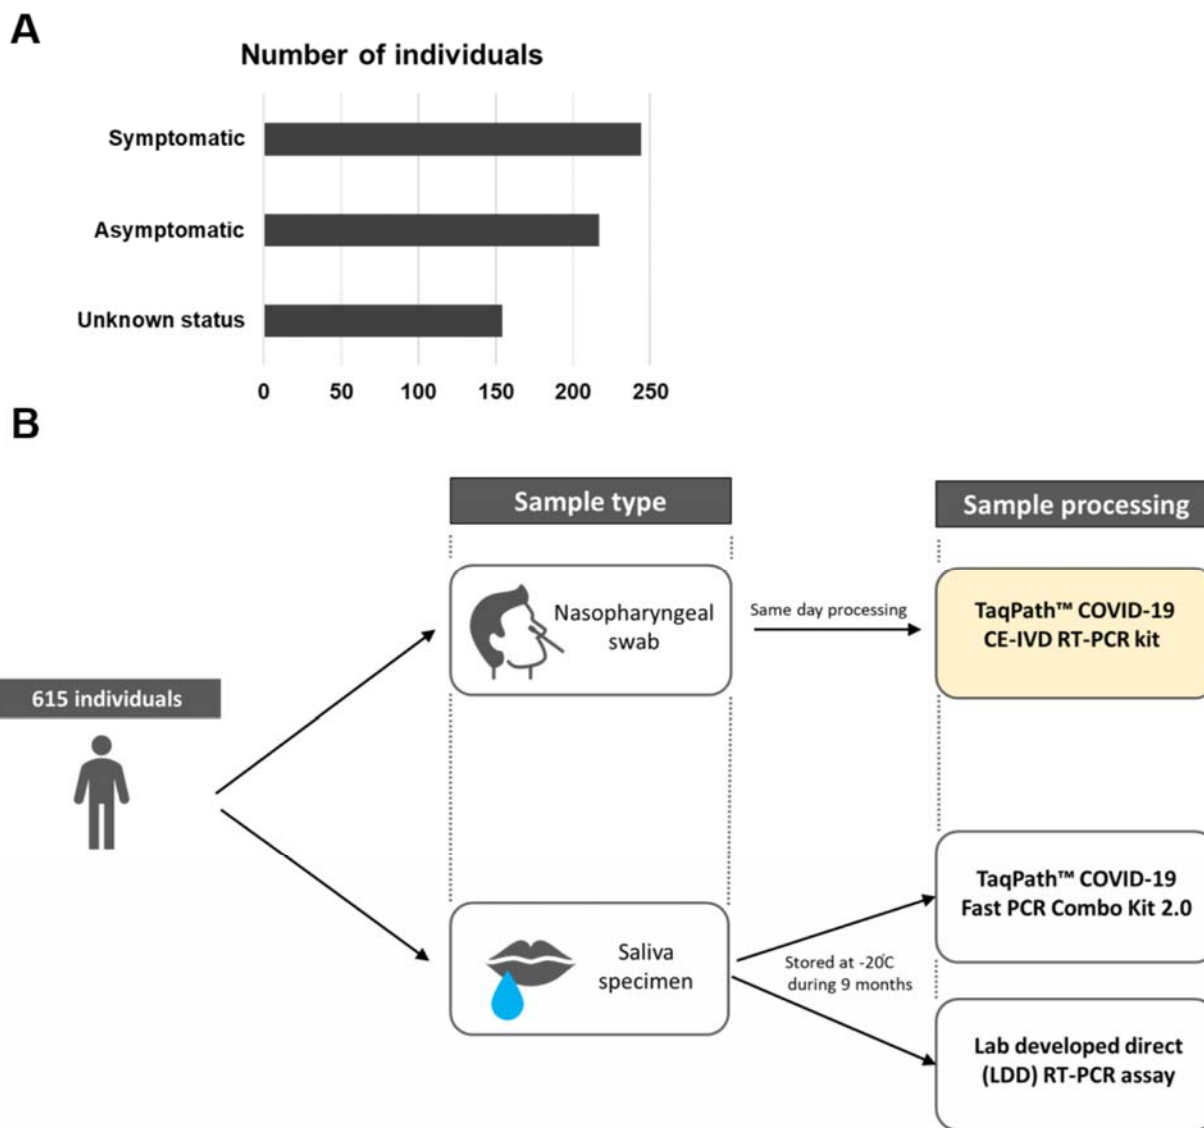

424

425

426 Figure 2

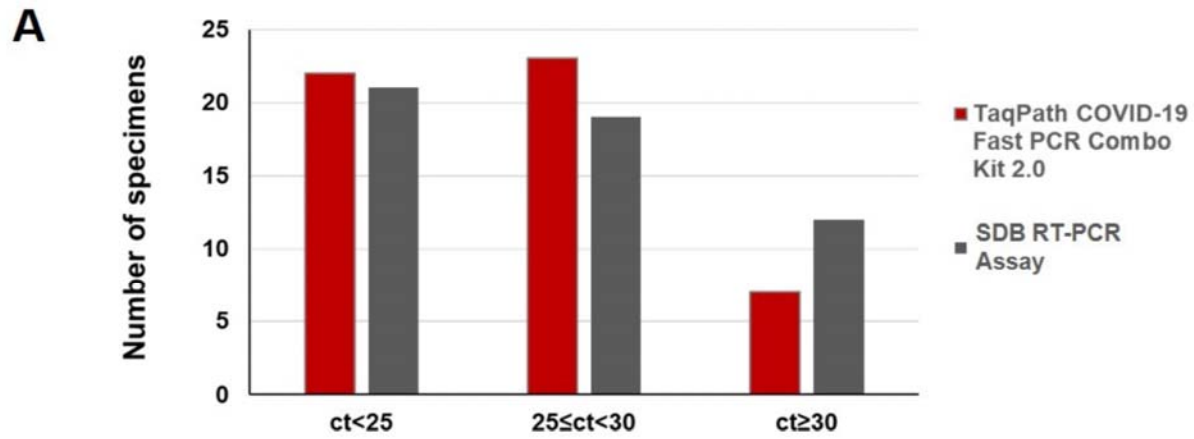

**B**

TaqPath™ COVID-19 Fast PCR Combo Kit 2.0

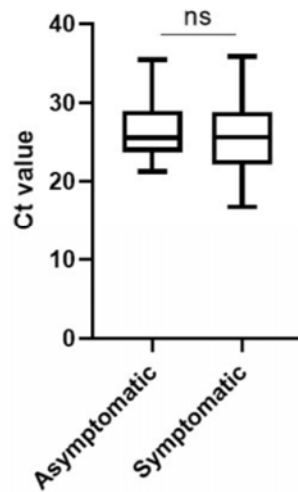

**C**

In-house RT-PCR

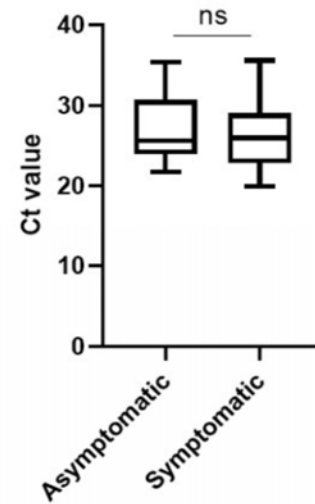

427

428

|                                                     |          | <b>Extraction based RT-PCR from<br/>nasopharyngeal swab samples</b> |          |       |
|-----------------------------------------------------|----------|---------------------------------------------------------------------|----------|-------|
|                                                     |          | Positive                                                            | Negative | Total |
| <b>TaqPath™ COVID-19 Fast<br/>PCR Combo Kit 2.0</b> | Positive | 49                                                                  | 3        | 52    |
|                                                     | Negative | 10                                                                  | 534      | 544   |
| <b>Total</b>                                        |          | 59                                                                  | 537      | 596   |
| <b>Positive Percent Agreement (PPA)</b>             |          | <b>83.05%</b> [71.54% to 90.52%]                                    |          |       |
| <b>Negative Percent Agreement (NPA)</b>             |          | <b>99.44%</b> [98.37% to 99.81%]                                    |          |       |

429

430 **Table 1. Positive and negative percent agreement of the raw saliva-based testing using the TaqPath™**  
431 **COVID-19 Fast PCR Combo Kit 2.0 and the nasopharyngeal swab-based testing using an RNA-extraction RT-**  
432 **PCR diagnostic assay.** Each individual provided one saliva and one nasopharyngeal swab sample on the same day.  
433 The nasopharyngeal swabs were processed on the same or following day, while the saliva testing was performed on  
434 samples following storage at -20 °C for several months.

435

436

|                                         |          | <b>Extraction based RT-PCR from<br/>nasopharyngeal swab samples</b> |          |       |
|-----------------------------------------|----------|---------------------------------------------------------------------|----------|-------|
|                                         |          | Positive                                                            | Negative | Total |
| <b>SDB RT-PCR assay</b>                 | Positive | 50                                                                  | 2        | 52    |
|                                         | Negative | 9                                                                   | 535      | 544   |
|                                         | Total    | 59                                                                  | 537      | 596   |
| <b>Positive Percent Agreement (PPA)</b> |          | 84.75% [73.48% to 91.76%]                                           |          |       |
| <b>Negative Percent Agreement (NPA)</b> |          | 99.63% [98.65% to 99.90%]                                           |          |       |

437

438 **Table 2. Positive and negative percent agreement of the raw saliva-based testing using the SDB RT-PCR**  
439 **assay and the nasopharyngeal swab-based testing using an RNA-extraction RT-PCR diagnostic assay.** Each  
440 individual provided one saliva and one nasopharyngeal swab sample on the same day. The nasopharyngeal swabs  
441 were processed on the same or following day, while the saliva testing was performed on samples following storage at  
442 -20 °C for several months.

443

444 **Figure 1. Study design.**

445 **A)** Cohort description based on the symptomatic status. **B)** A total of 615 individuals provided  
446 saliva and nasopharyngeal swab samples on the same day. Samples were processed according to  
447 the algorithm shown.

448

449 **Figure 2. Saliva based SARS-CoV-2 testing Ct values.**

450 **A)** Distribution of samples across high, medium and low viral loads grouped by Ct value  
451 detected with TaqPath Fast 2.0 kit or SDB RT-PCR. **B-C)** Comparison of the median Ct values  
452 between the symptomatic and asymptomatic individuals positive for SARS-CoV-2 using either  
453 the TaqPath COVID-19 Fast 2.0 kit (**B**) or the SDB RT-PCR test (**C**). The box plots show the  
454 median (bold horizontal line), interquartile range (box), and total range (whiskers) of detected Ct  
455 values.

456

457
